# Supplementary material
Source: MDPI journal article supplement (https://www.mdpi.com/1424-2818/15/1/46)
Supplement: s1 [file s1]

Archive with 2 entries (2 files):
- Hegazi-Supplementary figs.pdf
- hegazi-supplementary tables.pdf
